# Supplementary material for: Disparities in Mental Health Care Utilization and Perceived Need Among Asian Americans: 2012–2016
Source: Atypon-hosted journal article supplement (doi:10.1176/appi.ps.201900126), 2019-10-02
Supplement: appi.ps.201900126.ds001.pdf [file appi.ps.201900126.ds001.pdf]

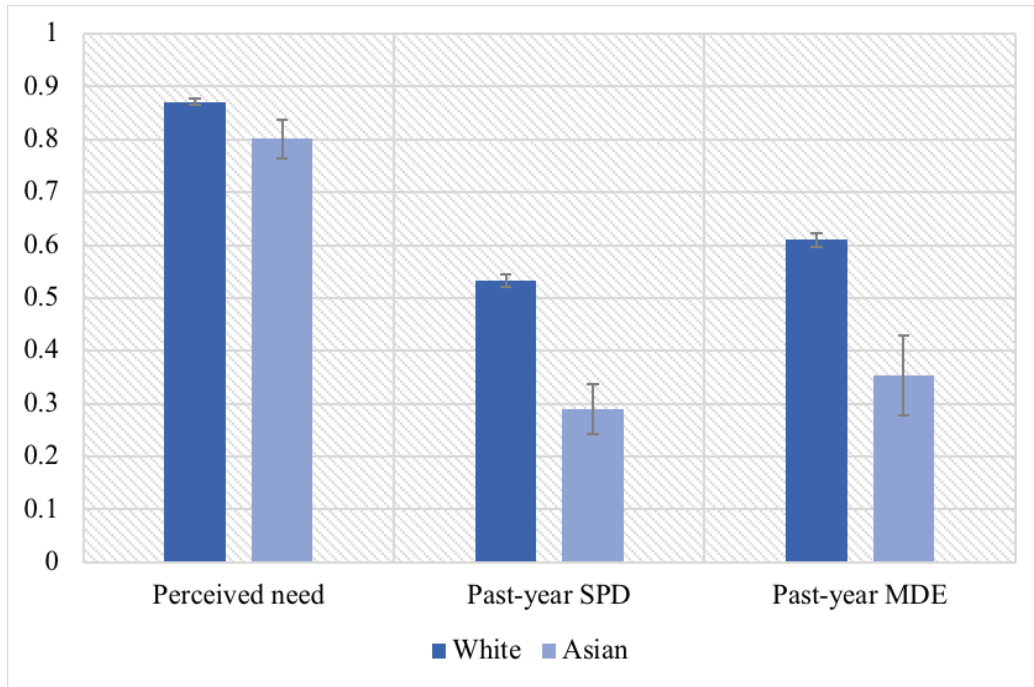

**Figure S1.** Predicted probabilities of past-year mental health treatment by need definition, after adjustment for overall health, age, sex, marital status, income, education level, insurance status, county type, and employment status.

**Table S1. Odds of endorsement of treatment barrier by Asians with unmet perceived need, after adjustment for overall health, age, sex, marital status, income, education level, insurance status, county type, and employment status.**

| Reasons for unmet need (overall)                             | Odds ratio | 95% CI      | P-value |
|--------------------------------------------------------------|------------|-------------|---------|
| Affordability                                                |            |             |         |
| Couldn't afford cost                                         | 0.634      | 0.428-0.940 | 0.024   |
| Insurance didn't cover all mental health treatment           | 1.578      | 0.992-2.512 | 0.054   |
| Insurance didn't pay enough for mental health treatment      | 1.140      | 0.706-1.838 | 0.59    |
| Treatment access                                             |            |             |         |
| No transportation/inconvenient                               | 1.393      | 0.754-2.572 | 0.286   |
| Didn't know where to go                                      | 1.613      | 1.091-2.385 | 0.017   |
| Stigma                                                       |            |             |         |
| Concerned neighbors or community would have negative opinion | 1.260      | 0.836-1.901 | 0.267   |
| Didn't want others to find out needed treatment              | 1.139      | 0.703-1.846 | 0.594   |
| Concerned about negative effect on job                       | 1.103      | 0.665-1.830 | 0.702   |
| Treatment not a priority                                     |            |             |         |
| Didn't think needed treatment                                | 1.349      | 0.839-2.170 | 0.214   |
| Thought could handle problem without treatment               | 1.007      | 0.746-1.359 | 0.964   |
| Didn't think treatment would help                            | 0.977      | 0.570-1.673 | 0.931   |
| Didn't have time                                             | 0.821      | 0.505-1.331 | 0.419   |

|                                                               |       |             |       |
|---------------------------------------------------------------|-------|-------------|-------|
| Fear                                                          |       |             |       |
| Concerned about confidentiality                               | 1.505 | 0.890-2.544 | 0.126 |
| Concerned about being committed or having to take<br>medicine | 0.807 | 0.521-1.249 | 0.332 |
| Other                                                         |       |             |       |

Data: 2012-2016 National Survey on Drug Use and Health

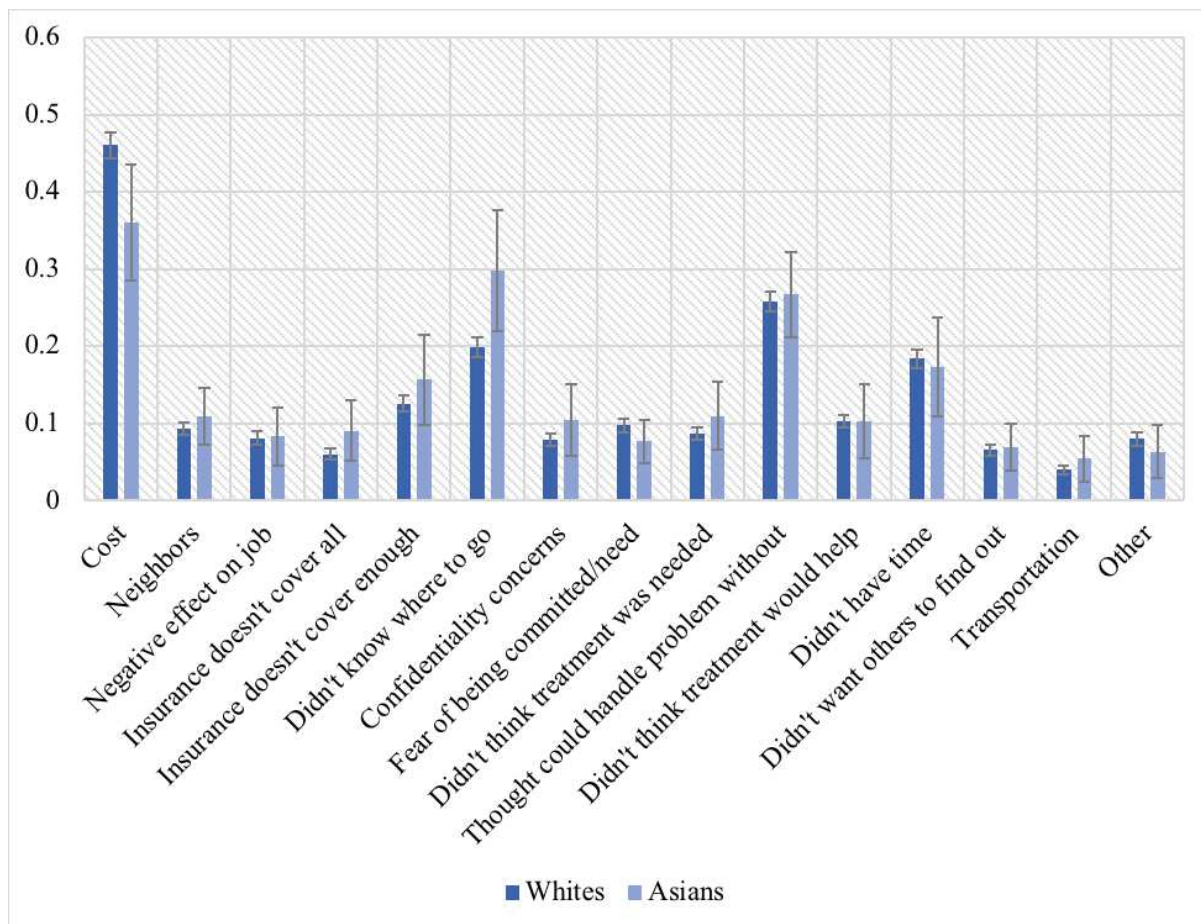

**Figure S2.** Predicted probabilities of treatment barrier endorsement, after adjustment for overall health, age, sex, marital status, income, education level, insurance status, county type, and employment status.
